# Supplementary material for: A Preliminary Study of Bacterioplankton Community Structure in the Taiyangshan Wetland in Ningxia and Its Driving Factors
Source: MDPI journal article supplement (doi:10.3390/ijerph191912224), 2022-09-27
Supplement: s1 [file s1]

# Supplementary Material

**Table S1.** Water environment parameters (mean  $\pm$  SD) of the Taiyangshan wetland in different lake regions.

| Environmental Parameters                            | Lake Region I     | Lake Region II    | Lake Region III   | Lake Region IV      | Statistical Significance |
|-----------------------------------------------------|-------------------|-------------------|-------------------|---------------------|--------------------------|
| WT ( $^{\circ}\text{C}$ )                           | 18.92 $\pm$ 7.92  | 17.96 $\pm$ 4.65  | 19.08 $\pm$ 5.23  | 19.08 $\pm$ 7.14    | ns                       |
| Cond ( $\mu\text{S}/\text{cm}$ )                    | 11154 $\pm$ 1320  | 5717 $\pm$ 1078   | 10593 $\pm$ 1957  | 39284 $\pm$ 6818    | *                        |
| DO ( $\text{mg}/\text{L}$ )                         | 6.15 $\pm$ 1.65   | 5.44 $\pm$ 1.22   | 5.46 $\pm$ 0.87   | 5.99 $\pm$ 1.44     | ns                       |
| Sal (ppt)                                           | 6.33 $\pm$ 1.20   | 3.63 $\pm$ 1.00   | 6.43 $\pm$ 1.32   | 26.99 $\pm$ 5.02    | *                        |
| TDS ( $\text{mg}/\text{L}$ )                        | 7307 $\pm$ 1077   | 4019 $\pm$ 756    | 7319 $\pm$ 1404   | 26784 $\pm$ 5002    | *                        |
| pH                                                  | 8.42 $\pm$ 0.84   | 7.79 $\pm$ 0.22   | 8.25 $\pm$ 0.33   | 8.71 $\pm$ 0.72     | ns                       |
| TN ( $\text{mg}/\text{L}$ )                         | 1.25 $\pm$ 0.58   | 0.94 $\pm$ 0.83   | 5.26 $\pm$ 1.11   | 3.3 $\pm$ 0.82      | *                        |
| $\text{NH}_4^{+}\text{-N}$ ( $\text{mg}/\text{L}$ ) | 0.60 $\pm$ 0.21   | 0.43 $\pm$ 0.4    | 1.29 $\pm$ 1.11   | 2.1 $\pm$ 1.67      | *                        |
| TP ( $\text{mg}/\text{L}$ )                         | 0.06 $\pm$ 0.04   | 0.03 $\pm$ 0.01   | 0.07 $\pm$ 0.08   | 0.05 $\pm$ 0.03     | ns                       |
| AP ( $\text{mg}/\text{L}$ )                         | 0.014 $\pm$ 0.016 | 0.005 $\pm$ 0.005 | 0.005 $\pm$ 0.004 | 0.007 $\pm$ 0.008   | ns                       |
| $\text{COD}_{\text{Mn}}$ ( $\text{mg}/\text{L}$ )   | 4.92 $\pm$ 0.59   | 2.72 $\pm$ 0.95   | 4.11 $\pm$ 0.92   | 11.55 $\pm$ 1.66    | *                        |
| $\text{COD}_{\text{Cr}}$ ( $\text{mg}/\text{L}$ )   | 29.3 $\pm$ 8.36   | 13.97 $\pm$ 6.79  | 39.25 $\pm$ 27.31 | 204.19 $\pm$ 209.76 | *                        |
| $\text{F}^{-}$ ( $\text{mg}/\text{L}$ )             | 3.79 $\pm$ 0.87   | 4.03 $\pm$ 0.81   | 3.51 $\pm$ 0.78   | 4.42 $\pm$ 0.97     | ns                       |
| $\text{Cl}^{-}$ ( $\text{mg}/\text{L}$ )            | 8292 $\pm$ 4484   | 2802 $\pm$ 682    | 5703 $\pm$ 1842   | 30729 $\pm$ 8564    | *                        |
| $\text{SO}_4^{2-}$ ( $\text{mg}/\text{L}$ )         | 3247 $\pm$ 161    | 1662 $\pm$ 201    | 3332 $\pm$ 382    | 14374 $\pm$ 773     | *                        |
| Chl <i>a</i> ( $\text{mg}/\text{L}$ )               | 14.68 $\pm$ 8.68  | 24.1 $\pm$ 14.12  | 39.57 $\pm$ 14.15 | 12.77 $\pm$ 4.64    | *                        |

ns, non-significant; \*,  $p < 0.05$ . The means of each water environment parameter were the averaged value over all three sampling periods.

**Table S2.** Alpha diversity indexes of each sampling site.

| Sample ID | OTU | ACE       | Chao1     | Simpson | Shannon |
|-----------|-----|-----------|-----------|---------|---------|
| Apr.S1    | 508 | 623.0323  | 654.6538  | 0.0397  | 4.077   |
| Apr.S2    | 433 | 555.4241  | 558.1017  | 0.0516  | 3.5934  |
| Apr.S3    | 624 | 1058.43   | 924.9157  | 0.0483  | 3.6792  |
| Apr.S4    | 312 | 356.5453  | 375.3704  | 0.0585  | 3.4958  |
| Apr.S5    | 594 | 821.7487  | 781.0312  | 0.0684  | 3.5451  |
| Apr.S6    | 542 | 582.4524  | 612.0227  | 0.0561  | 3.8382  |
| Apr.S7    | 477 | 708.4499  | 677       | 0.0443  | 3.6002  |
| Apr.S8    | 414 | 528.8062  | 531.1852  | 0.0664  | 3.5822  |
| Apr.S9    | 316 | 877.1245  | 564.3333  | 0.0719  | 3.1085  |
| Apr.S10   | 286 | 426.2628  | 417.3182  | 0.0547  | 3.3232  |
| Apr.S11   | 366 | 494.2923  | 475.1695  | 0.0926  | 3.0277  |
| Jul.S1    | 813 | 911.8909  | 916.6     | 0.0247  | 4.584   |
| Jul.S2    | 417 | 847.7398  | 697.9149  | 0.1523  | 2.832   |
| Jul.S3    | 689 | 747.8786  | 757.2432  | 0.0617  | 3.9569  |
| Jul.S4    | 493 | 666.3244  | 638.087   | 0.0512  | 3.9942  |
| Jul.S5    | 742 | 835.1615  | 838.8     | 0.0877  | 4.4584  |
| Jul.S6    | 513 | 542.1076  | 557.4516  | 0.0149  | 4.8798  |
| Jul.S7    | 659 | 931.5553  | 871.8983  | 0.0244  | 4.9072  |
| Jul.S8    | 624 | 819.3439  | 799.375   | 0.0503  | 3.9121  |
| Jul.S9    | 687 | 730.8191  | 751.1875  | 0.0102  | 5.2281  |
| Jul.S10   | 520 | 803.8534  | 679.0128  | 0.0169  | 4.7677  |
| Jul.S11   | 645 | 690.3387  | 699.1852  | 0.0142  | 4.9475  |
| Oct.S1    | 744 | 987.2557  | 963.3782  | 0.0592  | 3.7176  |
| Oct.S2    | 814 | 1097.0193 | 1128.6875 | 0.0664  | 3.6428  |

|         |     |           |           |        |        |
|---------|-----|-----------|-----------|--------|--------|
| Oct.S3  | 768 | 1084.9856 | 1039.527  | 0.0881 | 3.9256 |
| Oct.S4  | 794 | 1103.4786 | 1102.431  | 0.0445 | 4.0049 |
| Oct.S5  | 776 | 988.3786  | 1020.8627 | 0.1059 | 3.5115 |
| Oct.S6  | 892 | 1039.5933 | 1083.2059 | 0.0112 | 5.3239 |
| Oct.S7  | 946 | 1204.4478 | 1177.9942 | 0.0521 | 4.1481 |
| Oct.S8  | 909 | 1245.9388 | 1285.9106 | 0.0515 | 4.2055 |
| Oct.S9  | 759 | 1035.7322 | 996.4264  | 0.0668 | 3.9634 |
| Oct.S10 | 878 | 1199.3923 | 1177.0197 | 0.0577 | 4.0909 |
| Oct.S11 | 946 | 1249.4291 | 1237.2338 | 0.0614 | 4.0235 |

**Table S3.** The topology parameters of co-occurrence pattern networks in different sampling periods.

|         | <b>Nodes</b> | <b>Edges</b> | <b>AWD</b> | <b>Diameter</b> | <b>Density</b> | <b>Modularity</b> | <b>ACC</b> | <b>APL</b> |
|---------|--------------|--------------|------------|-----------------|----------------|-------------------|------------|------------|
| April   | 166          | 212          | 1.118      | 5               | 0.008          | 0.628             | 0.102      | 1.822      |
| July    | 440          | 2006         | 3.916      | 8               | 0.01           | 0.421             | 0.123      | 2.387      |
| October | 302          | 792          | 2.264      | 6               | 0.009          | 0.448             | 0.117      | 2.274      |

AWD, average weighted degree. ACC, average clustering coefficient. APL, average path length.

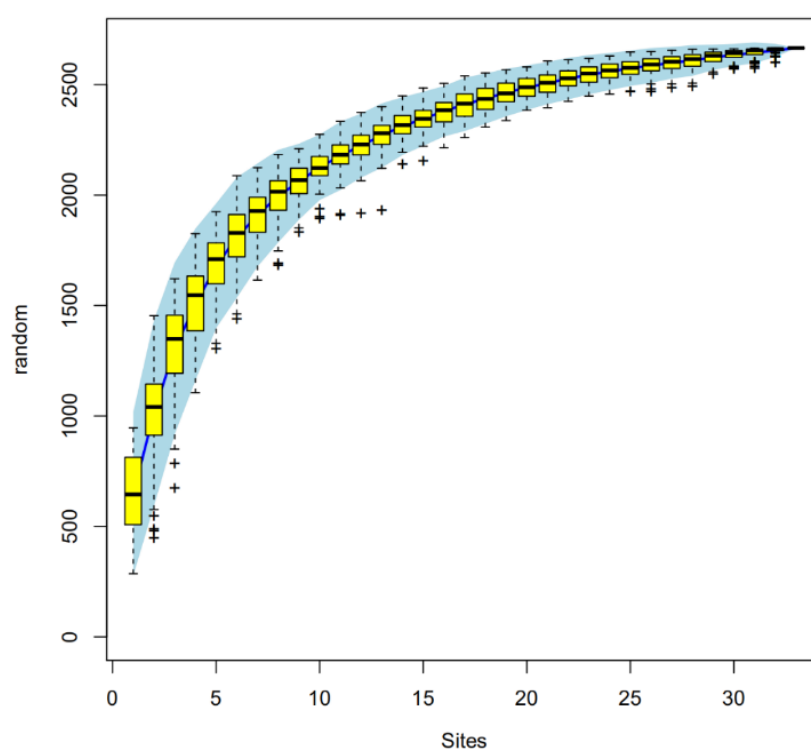

**Figure S1.** Species accumulation curves of bacterioplankton communities in the Taiyangshan wetland.

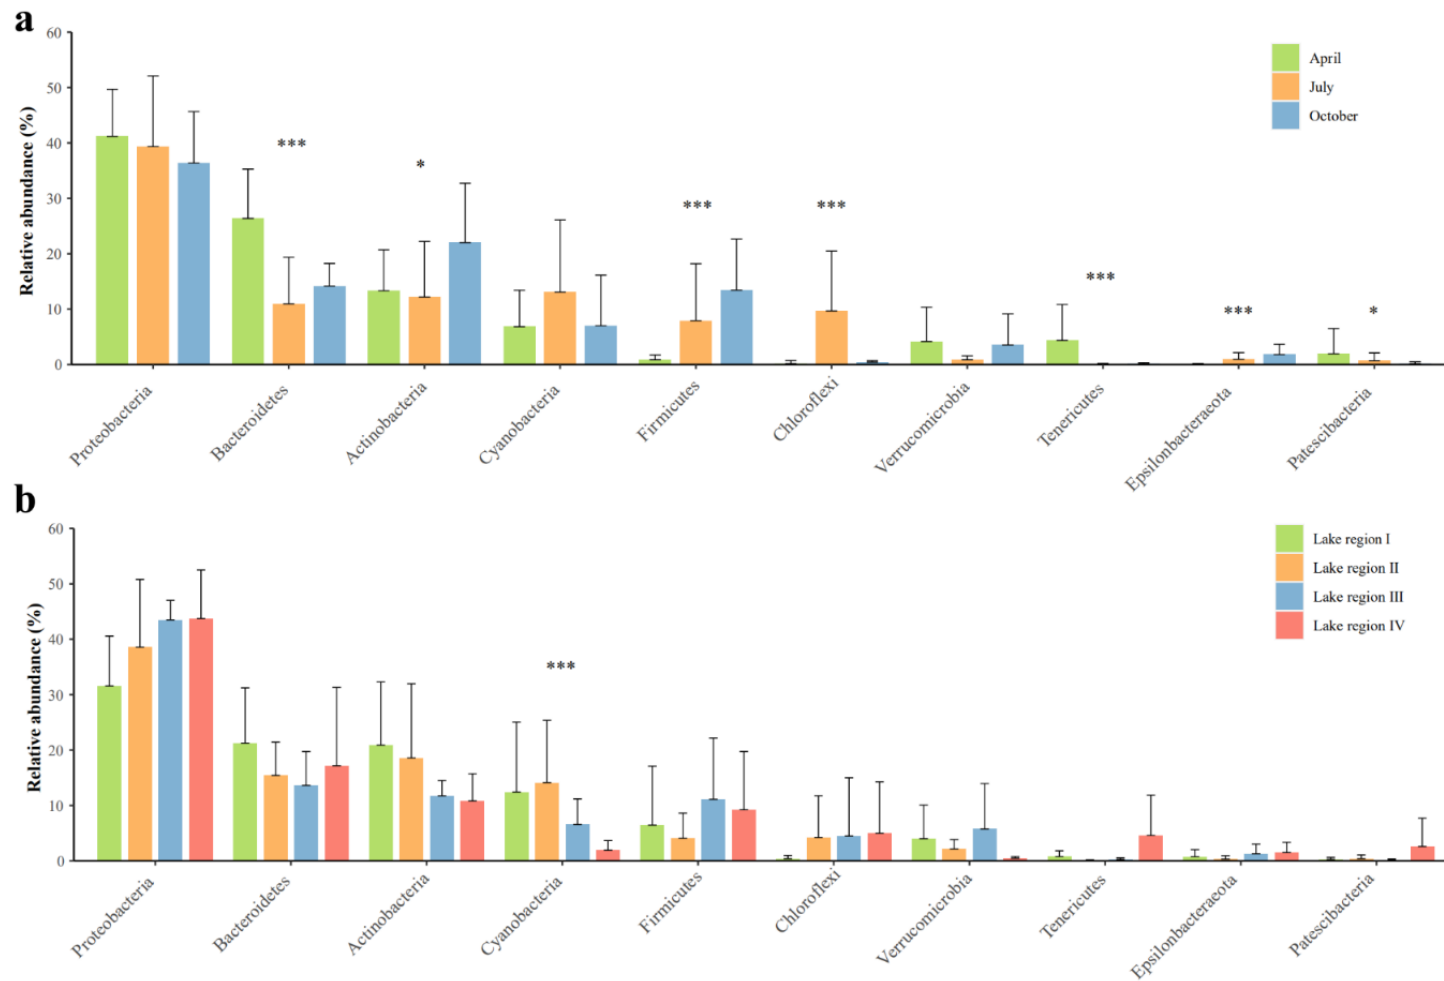

**Figure S2.** Relative abundance of different phyla between sampling periods (a) and lake regions (b) (\*  $p < 0.05$ , \*\*\*  $p < 0.001$ , Kruskal–Wallis test).

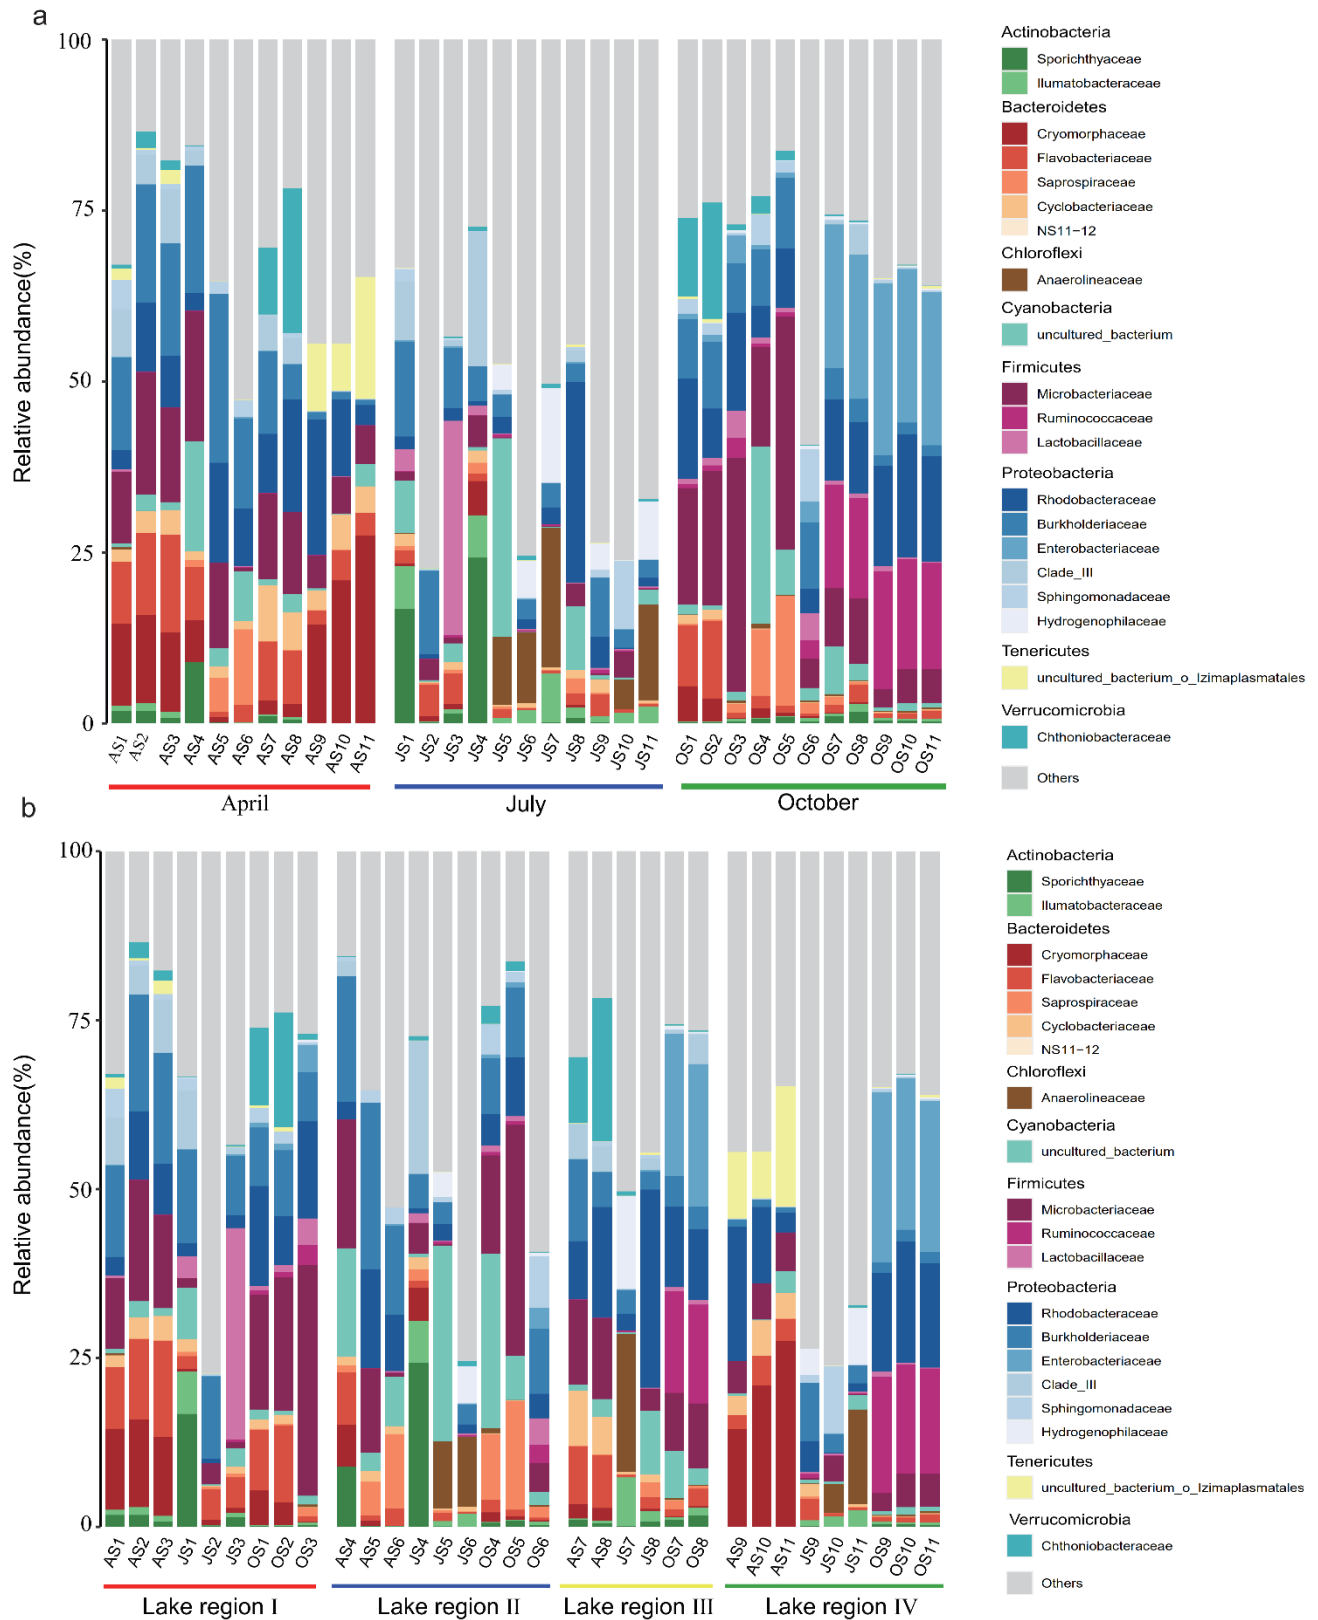

**Figure S3.** Relative abundances of the dominant bacterial families in sampling periods (a) and lake regions (b). Family with relative abundance <1% were defined as “other”.

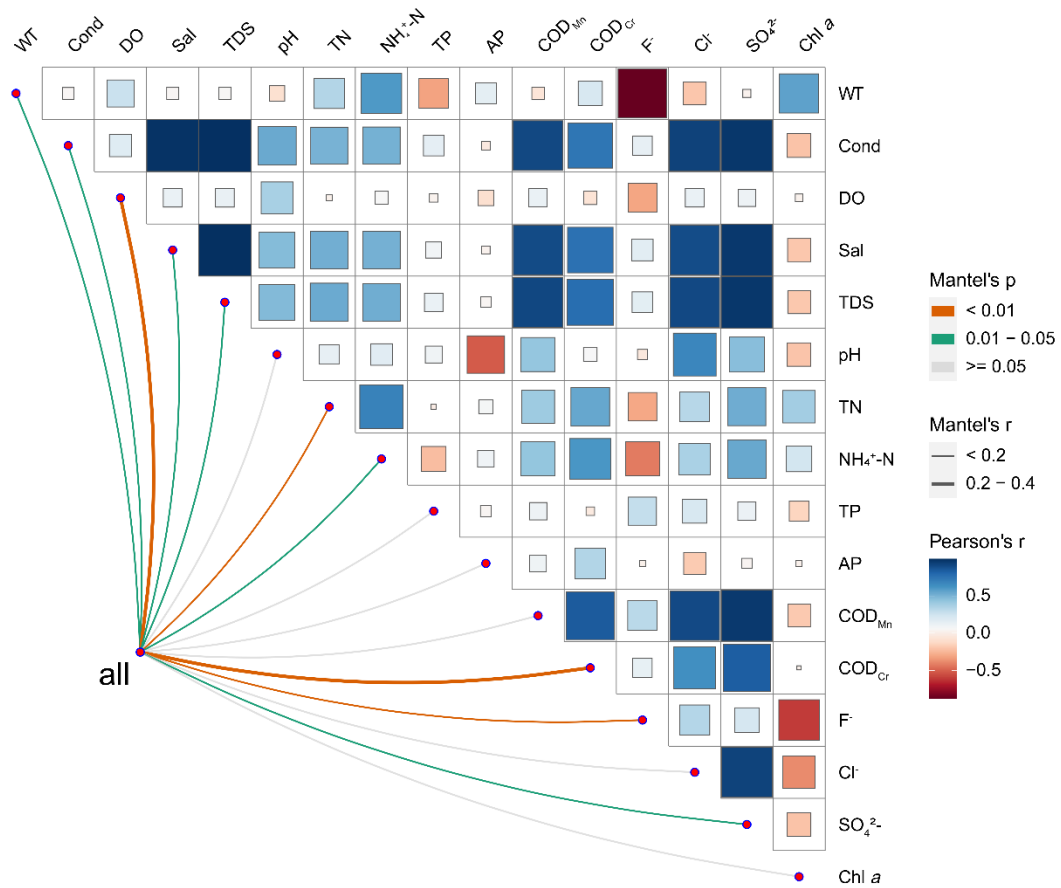

**Figure S4.** Environmental drivers of bacterioplankton community in the Taiyangshan wetland evaluated by mantel tests. Pairwise comparisons of water parameters are shown with a color gradient denoting Pearson's correlation coefficient. The edge width represents the corresponding distance correlations (Mantel's  $r$ ), and the edge color denotes the statistical significance (Mantel's  $p$ ).
